# Supplementary material for: SARS‐CoV‐2 structural coverage map reveals viral protein assembly, mimicry, and hijacking mechanisms
Source: PubMed Central journal article supplement (PMC8438690; doi:10.15252/msb.202010079), 2021-09-14

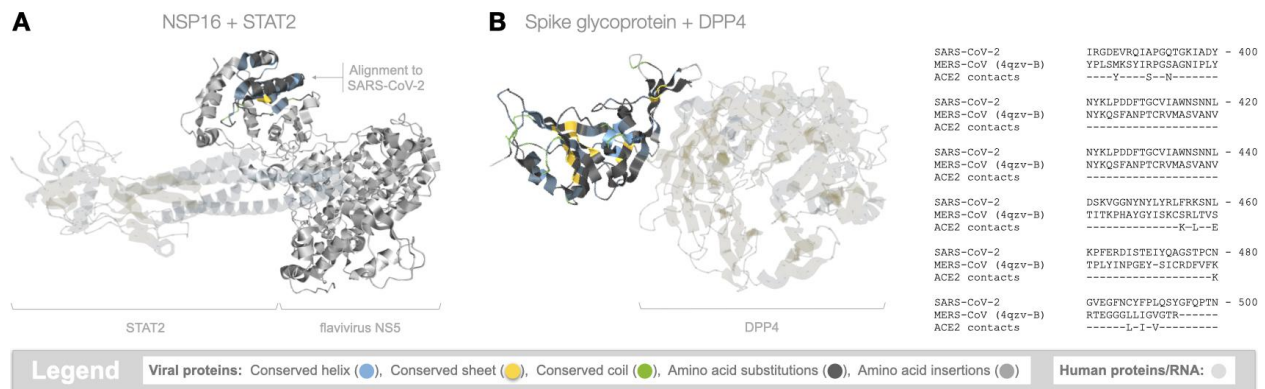

## Appendix Figure S1. Assessing structural evidence for STAT2 and DPP4 hijacking

These matching structures show putative interactions between viral and human proteins, but detailed analysis finds insufficient evidence that these proteins are hijacked by SARS-CoV-2. The structures are shown with Aquaria's default coloring scheme which, for viral proteins, highlights secondary structure as well as any amino acid substitutions and insertions in the alignment the SARS-CoV-2 sequences; human proteins are rendered as semi-transparent.

- A. Hijacking of STAT2 was shown in only one matching structure that was determined using a distantly related flavivirus protein called NS5 (Wang et al., 2020). Mapping the SARS-CoV-2 NSP16 sequence onto this structure ([PODTC1/6wcz](#)) reveals that the alignment has moderate significance ( $E = 10^{-16}$ ), low pairwise identity (13%), and does not include any of the residues that contact STAT2. Thus, we conclude that this matching structure does not provide evidence of hijacking of STAT2 by SARS-CoV-2.
- B. Hijacking of DPP4 was shown in only two matching structures, both determined using the spike glycoprotein from MERS-CoV (Lu et al., 2013; Wang et al., 2014). Mapping the SARS-CoV-2 spike glycoprotein sequence onto these structures reveals that the alignment has high significance ( $E \sim 10^{-46}$ ); however, for the structure shown here ([PODTC2/4qzv](#)), the overall pairwise similarity is low (21%), with no sequence identities amongst the 10 residue positions that directly contact DPP4. Thus, we concluded that these matching structures do not provide strong evidence of hijacking of STAT2 by SARS-CoV-2.

Made using Aquaria and edited in Keynote.

## References

- Lu, G., Hu, Y., Wang, Q., Qi, J., Gao, F., Li, Y., Zhang, Y., Zhang, W., Yuan, Y., Bao, J., Zhang, B., Shi, Y., Yan, J., Gao, G.F., 2013. Molecular basis of binding between novel human coronavirus MERS-CoV and its receptor CD26. *Nature* 500, 227–231. <https://doi.org/10.1038/nature12328>
- Wang, B., Thurmond, S., Zhou, K., Sánchez-Aparicio, M.T., Fang, J., Lu, J., Gao, L., Ren, W., Cui, Y., Veit, E.C., Hong, H., Evans, M.J., O'Leary, S.E., García-Sastre, A., Zhou, Z.H., Hai, R., Song, J., 2020. Structural basis for STAT2 suppression by flavivirus NS5. *Nat. Struct. Mol. Biol.* 27, 875–885. <https://doi.org/10.1038/s41594-020-0472-y>
- Wang, Q., Qi, J., Yuan, Y., Xuan, Y., Han, P., Wan, Y., Ji, W., Li, Y., Wu, Y., Wang, J., Iwamoto, A., Woo, P.C.Y., Yuen, K.-Y., Yan, J., Lu, G., Gao, G.F., 2014. Bat Origins of MERS-CoV Supported by Bat Coronavirus HKU4 Usage of Human Receptor CD26. *Cell Host Microbe* 16, 328–337. <https://doi.org/10.1016/j.chom.2014.08.009>

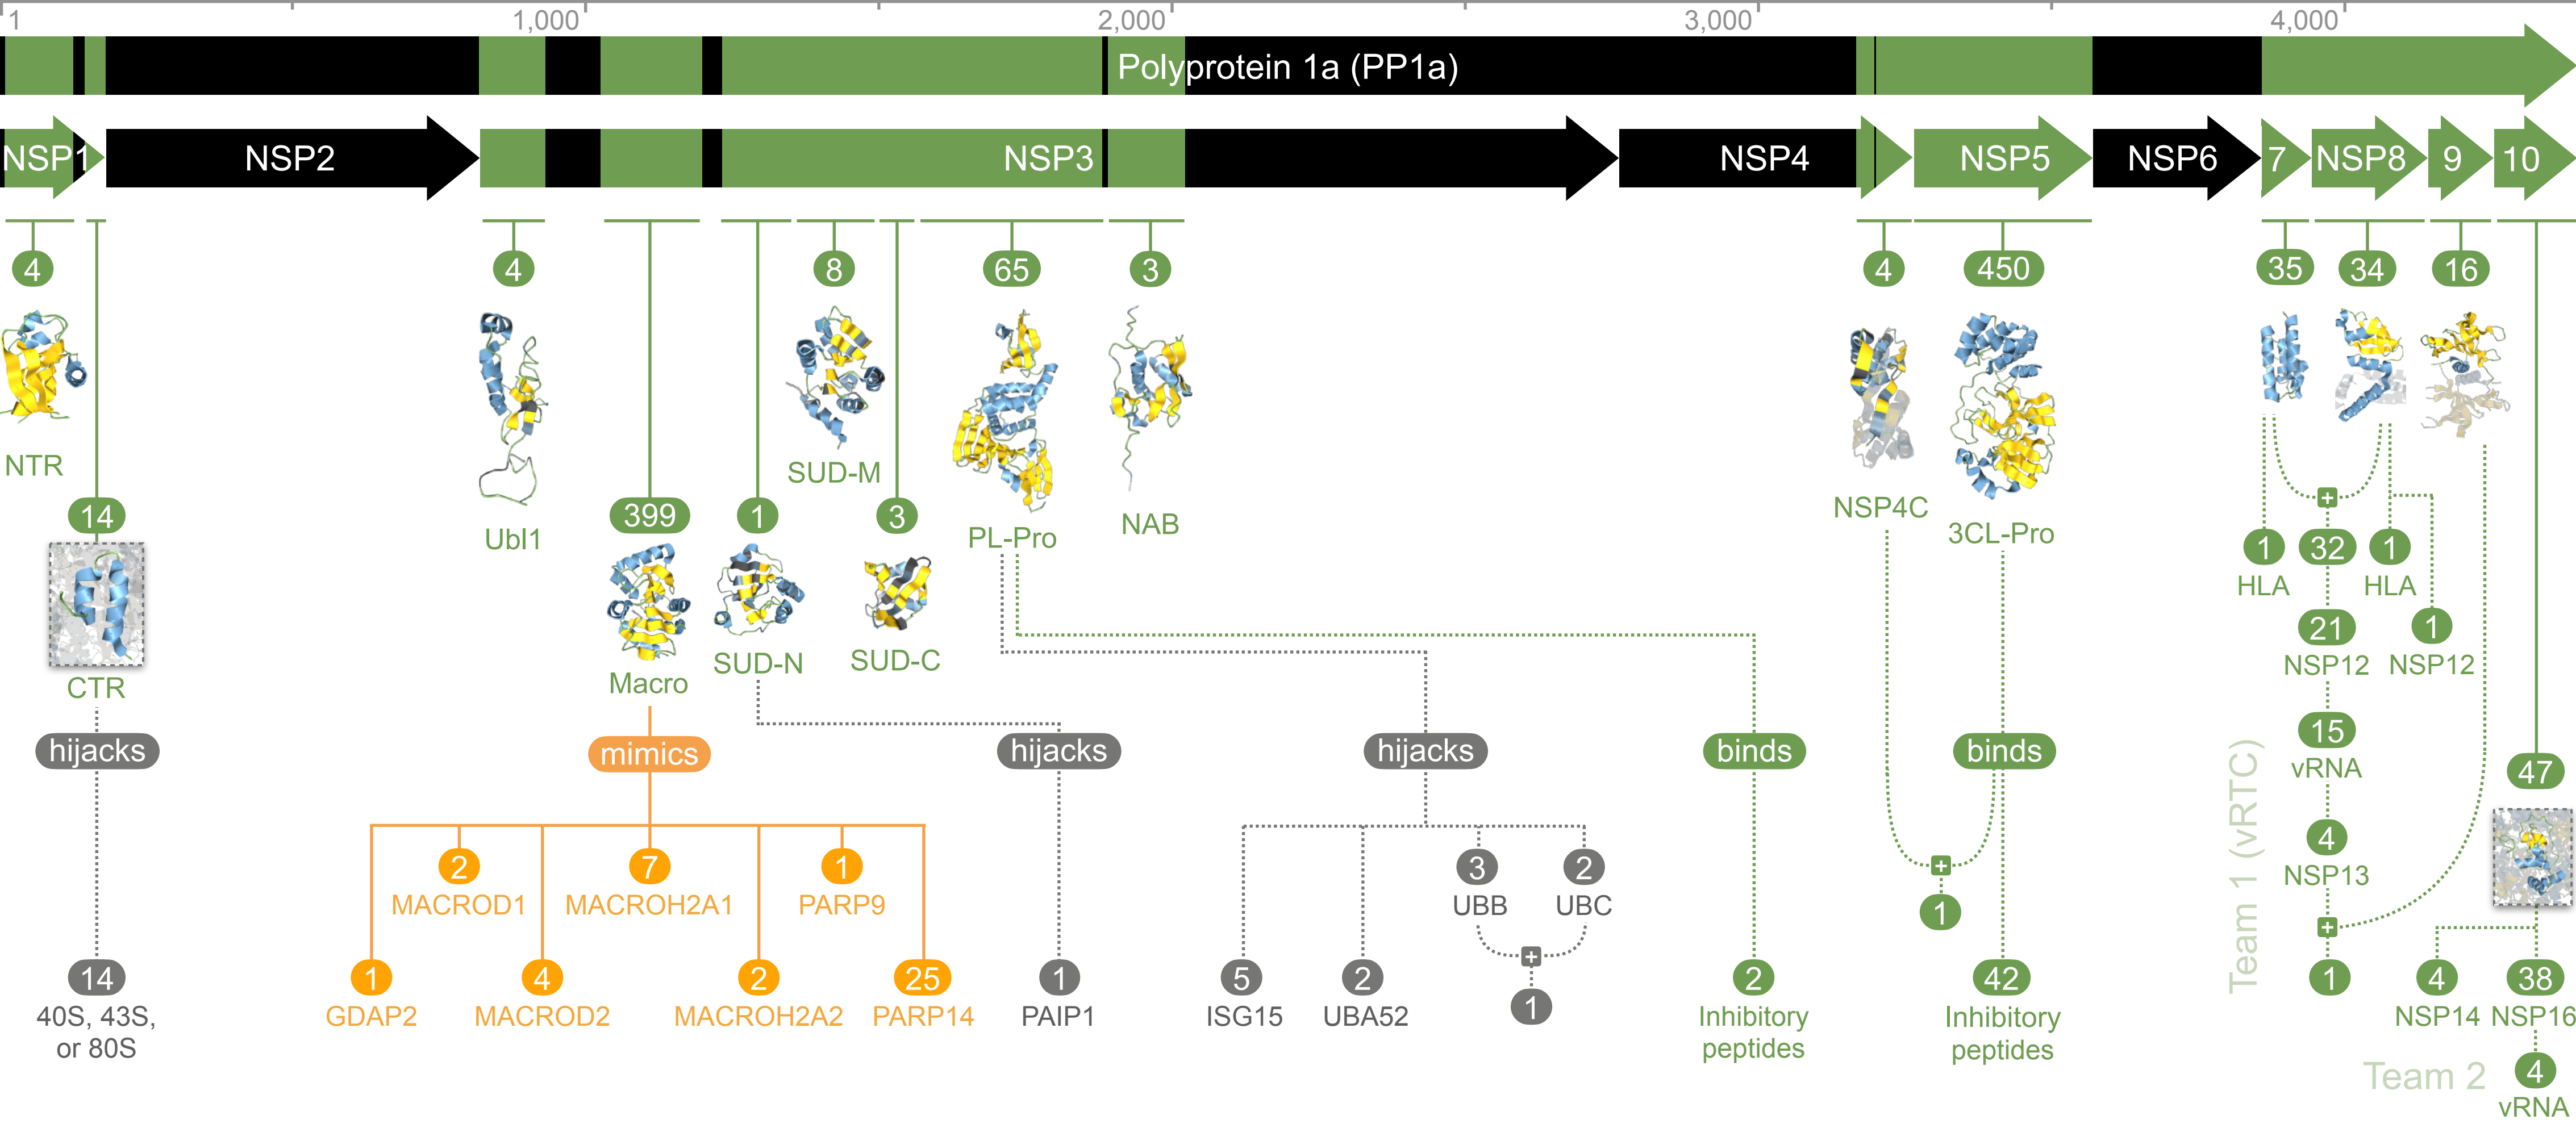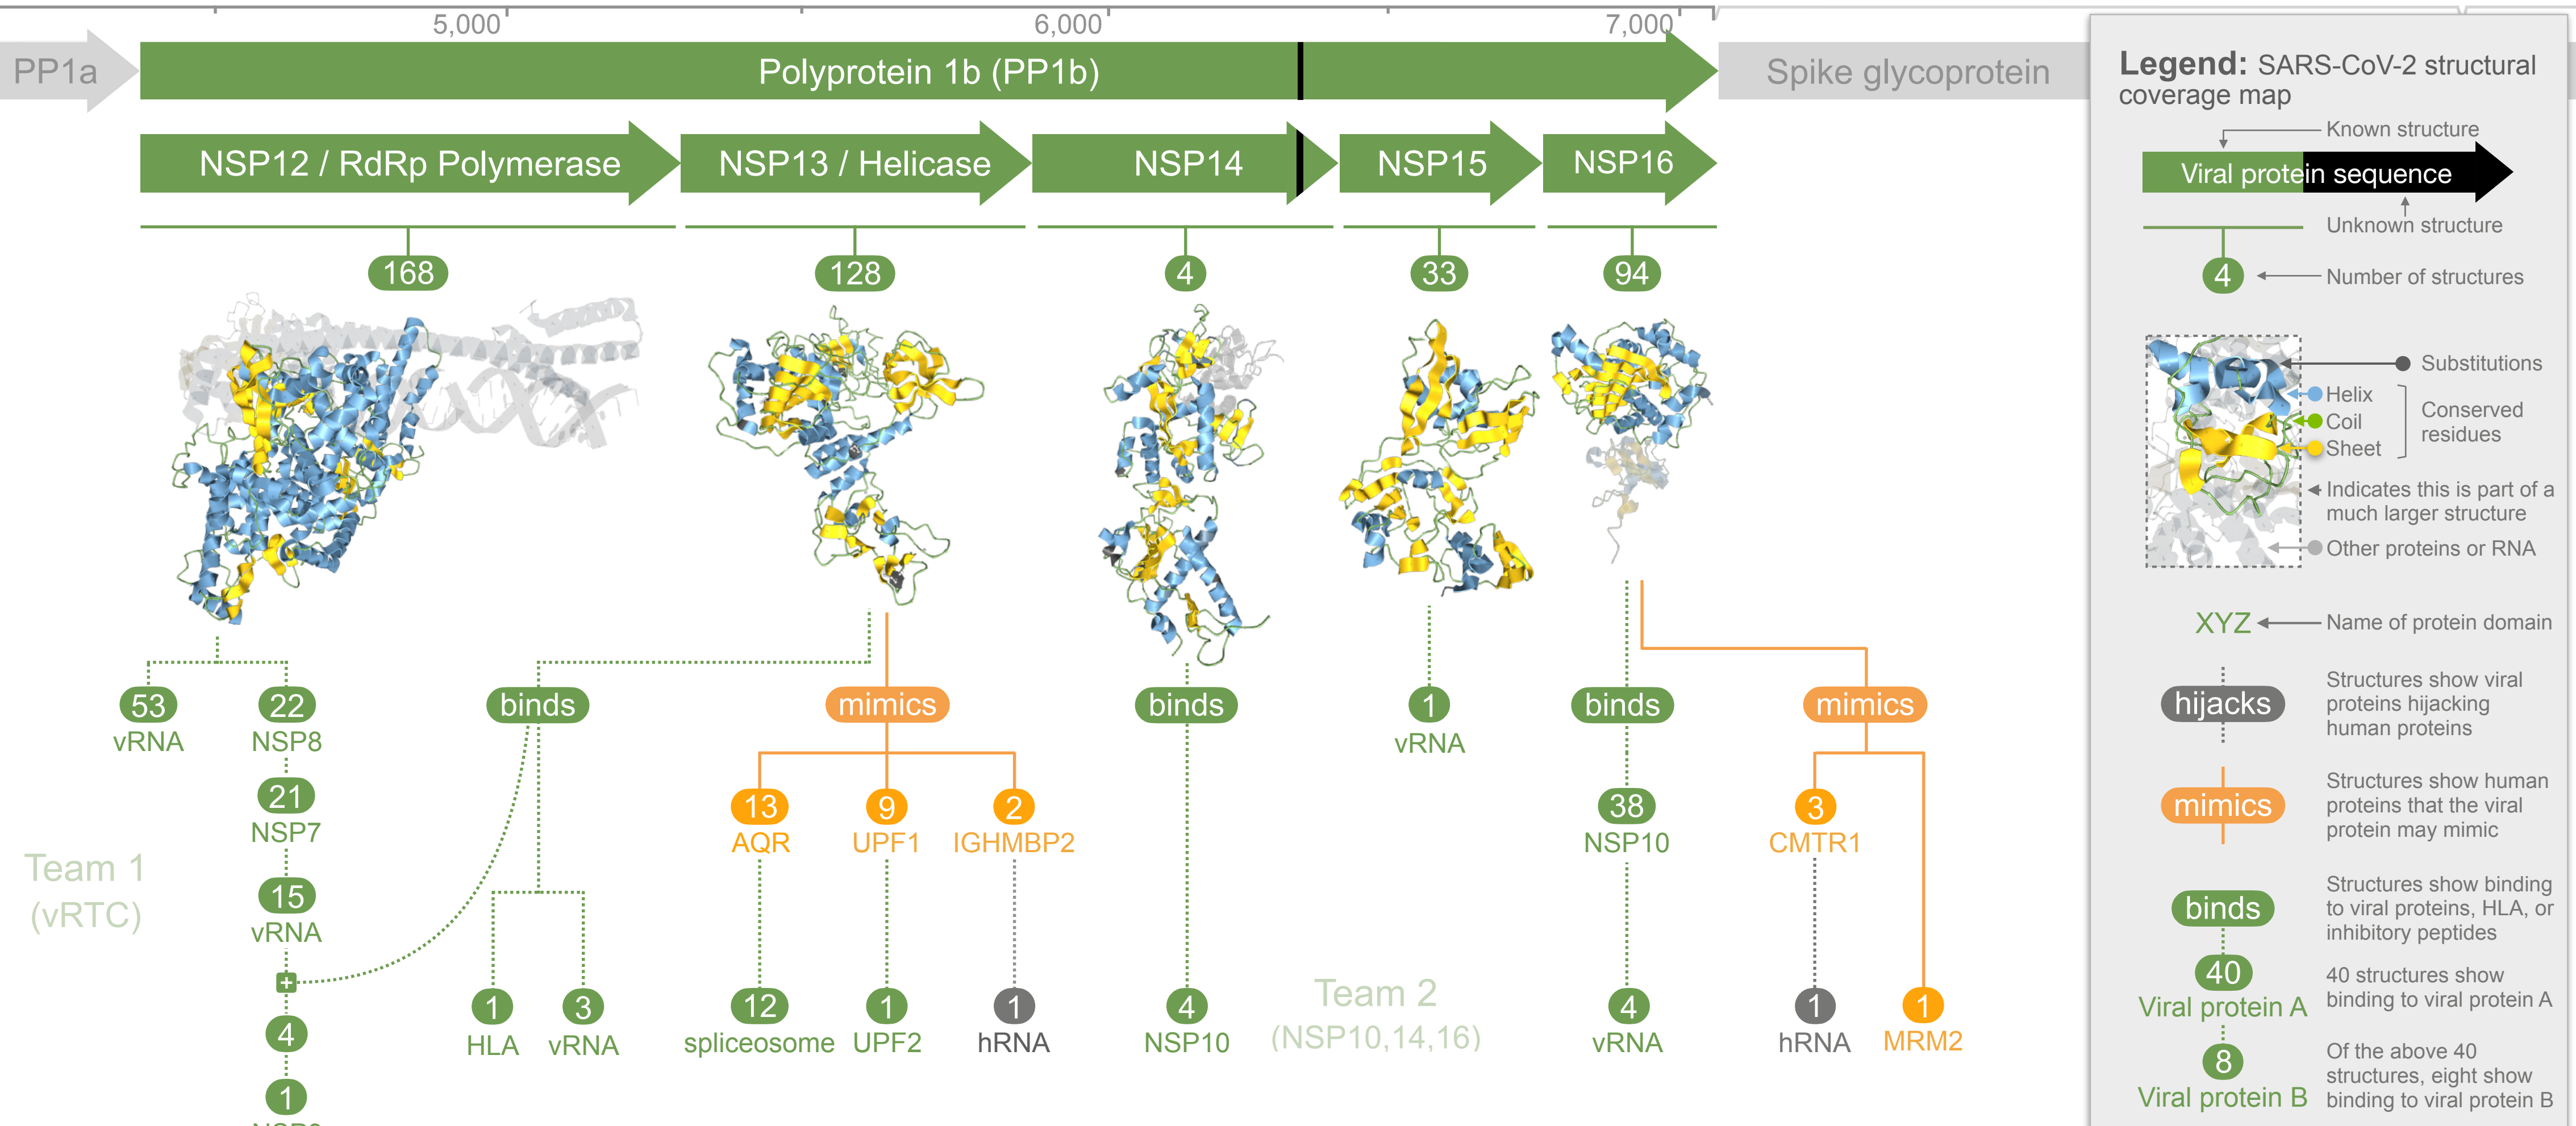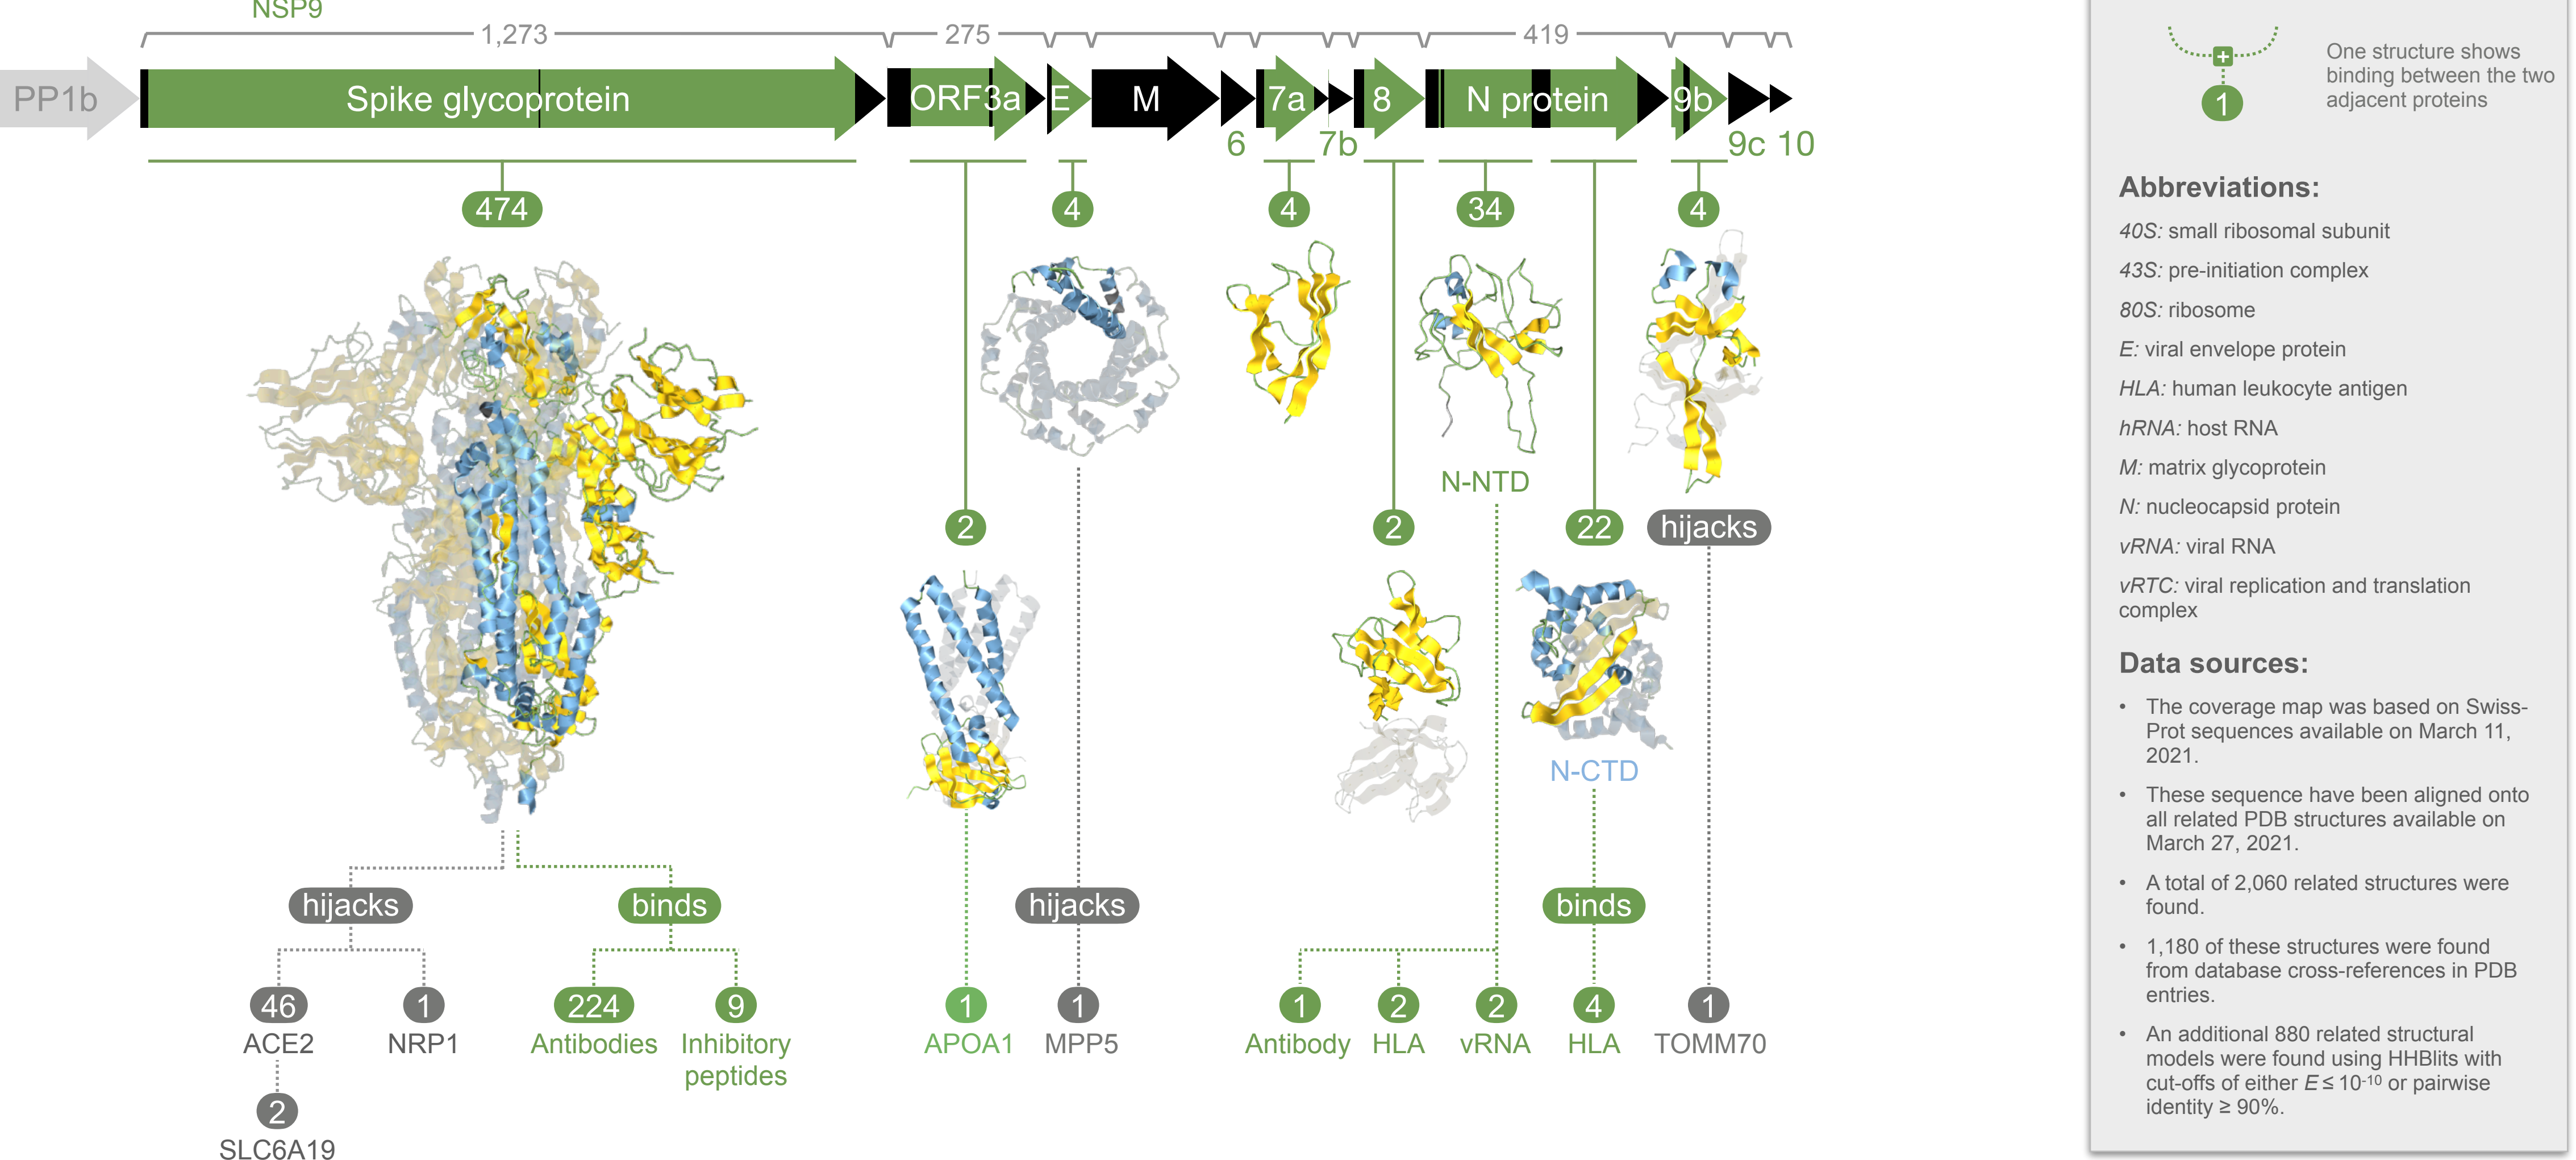

**Legend: SARS-CoV-2 structural coverage map**

Known structure  
Viral protein sequence  
Unknown structure  
Number of structures

Substitutions  
Conserved residues  
Helix  
Coil  
Sheet  
Indicates this is part of a much larger structure  
Other proteins or RNA

XYZ ← Name of protein domain

**hijacks** Structures show viral proteins hijacking human proteins

**mimics** Structures show human proteins that the viral protein may mimic

**binds** Structures show binding to viral proteins, HLA, or inhibitory peptides

**40** 40 structures show binding to viral protein A

**8** Of the above 40 structures, eight show binding to viral protein B

**+** One structure shows binding between the two adjacent proteins

**Abbreviations:**

40S: small ribosomal subunit  
43S: pre-initiation complex  
80S: ribosome  
E: viral envelope protein  
HLA: human leukocyte antigen  
hRNA: host RNA  
M: matrix glycoprotein  
N: nucleocapsid protein  
vRNA: viral RNA  
vRTC: viral replication and translation complex

**Data sources:**

- The coverage map was based on Swiss-Prot sequences available on March 11, 2021.
- These sequences have been aligned onto all related PDB structures available on March 27, 2021.
- A total of 2,060 related structures were found.
- 1,180 of these structures were found from database cross-references in PDB entries.
- An additional 880 related structural models were found using HHblits with cut-offs of either  $E \leq 10^{-10}$  or pairwise identity  $\geq 90\%$ .

## A NSP3 Mimicry of Host Proteins

| Host Protein | NSP3 Alignment    |          | Domain Topology | Potentially Hijacked Function                      |  |
|--------------|-------------------|----------|-----------------|----------------------------------------------------|--|
|              | E value           | Identity |                 |                                                    |  |
| MACROD2      | 10 <sup>-17</sup> | 28%      |                 | Erases ADPr, PAR, and AAR from D and E amino acids |  |
| MACROD1      | 10 <sup>-16</sup> | 27%      |                 | Erases ADPr, PAR, and AAR from D and E amino acids |  |
| GDAP2        | 10 <sup>-15</sup> | 20%      |                 | Binds ADPr; Transports lipids between membranes    |  |
| MACROH2A1    | 10 <sup>-13</sup> | 19%      |                 | Binds ADPr; Modifies chromatin state               |  |
| MACROH2A2    | 10 <sup>-12</sup> | 18%      |                 | Binds ADPr, PAR, and AAR; Modifies chromatin state |  |
| PARP14       | 10 <sup>-12</sup> | 25%      |                 | Binds ADPr; Adds PAR to D and E amino acids        |  |
|              | 10 <sup>-11</sup> | 20%      |                 |                                                    |  |
|              | 10 <sup>-10</sup> | 19%      |                 |                                                    |  |
| PARP9        | No 3D structure   |          |                 | Binds ADPr; Adds PAR to D and E amino acids        |  |
|              | 10 <sup>-11</sup> | 23%      |                 |                                                    |  |

## B NSP13 Mimicry of Host Proteins

| Host Protein | NSP13 Alignment   |          | Sequence-to-Structure Alignment                                               | 3D Structure                                                                                                                                                                                                                                     | Color Legend                                                                                                                                                                                                           | Potentially Hijacked Function |
|--------------|-------------------|----------|-------------------------------------------------------------------------------|--------------------------------------------------------------------------------------------------------------------------------------------------------------------------------------------------------------------------------------------------|------------------------------------------------------------------------------------------------------------------------------------------------------------------------------------------------------------------------|-------------------------------|
|              | E value           | Identity |                                                                               |                                                                                                                                                                                                                                                  |                                                                                                                                                                                                                        |                               |
| UPF1         | 10 <sup>-53</sup> | 24%      | <p>NSP13 sequence aligned onto 3D structure of UPF1 bound to UPF2</p>         | <ul style="list-style-type: none"> <li>● UPF2</li> <li>● Amino acid substitution</li> <li>● Conserved residue: Helix</li> <li>● Conserved residue: Sheet</li> <li>● Conserved residue: Coil</li> <li>● Does not align to NSP13</li> </ul>        | <p>Binds zinc</p> <p>Unwinds RNA</p> <p>Hydrolyzes ATP</p> <p>Binds chromatin</p> <p>Binds telomeric DNA</p> <p>Regulates nonsense-mediated decay of mRNAs</p>                                                         |                               |
| IGHMBP2      | 10 <sup>-32</sup> | 25%      | <p>NSP13 sequence aligned onto 3D structure of IGHMBP2 bound to human RNA</p> | <ul style="list-style-type: none"> <li>● hRNA</li> <li>● Amino acid substitution</li> <li>● Conserved residue: Helix</li> <li>● Conserved residue: Sheet</li> <li>● Conserved residue: Coil</li> <li>● Does not align to NSP13</li> </ul>        | <p>Binds zinc</p> <p>Hydrolyzes ATP</p> <p>Unwinds RNA &amp; DNA</p> <p>Repairs &amp; recombines DNA</p> <p>Regulates transcription &amp; translation</p> <p>Binds immunoglobulin mu chain switch region of genome</p> |                               |
| AQR          | 10 <sup>-27</sup> | 19%      | <p>NSP13 sequence aligned onto 3D structure of AQR bound to a spliceosome</p> | <ul style="list-style-type: none"> <li>● Spliceosome</li> <li>● Amino acid substitution</li> <li>● Conserved residue: Helix</li> <li>● Conserved residue: Sheet</li> <li>● Conserved residue: Coil</li> <li>● Does not align to NSP13</li> </ul> | <p>Unwinds RNA</p> <p>Splices mRNA</p> <p>Hydrolyzes ATP</p> <p>Repairs DNA damage</p> <p>DNA synthesis and ligation</p>                                                                                               |                               |

**A** NSP1 (CTR) + 40S ribosomal subunit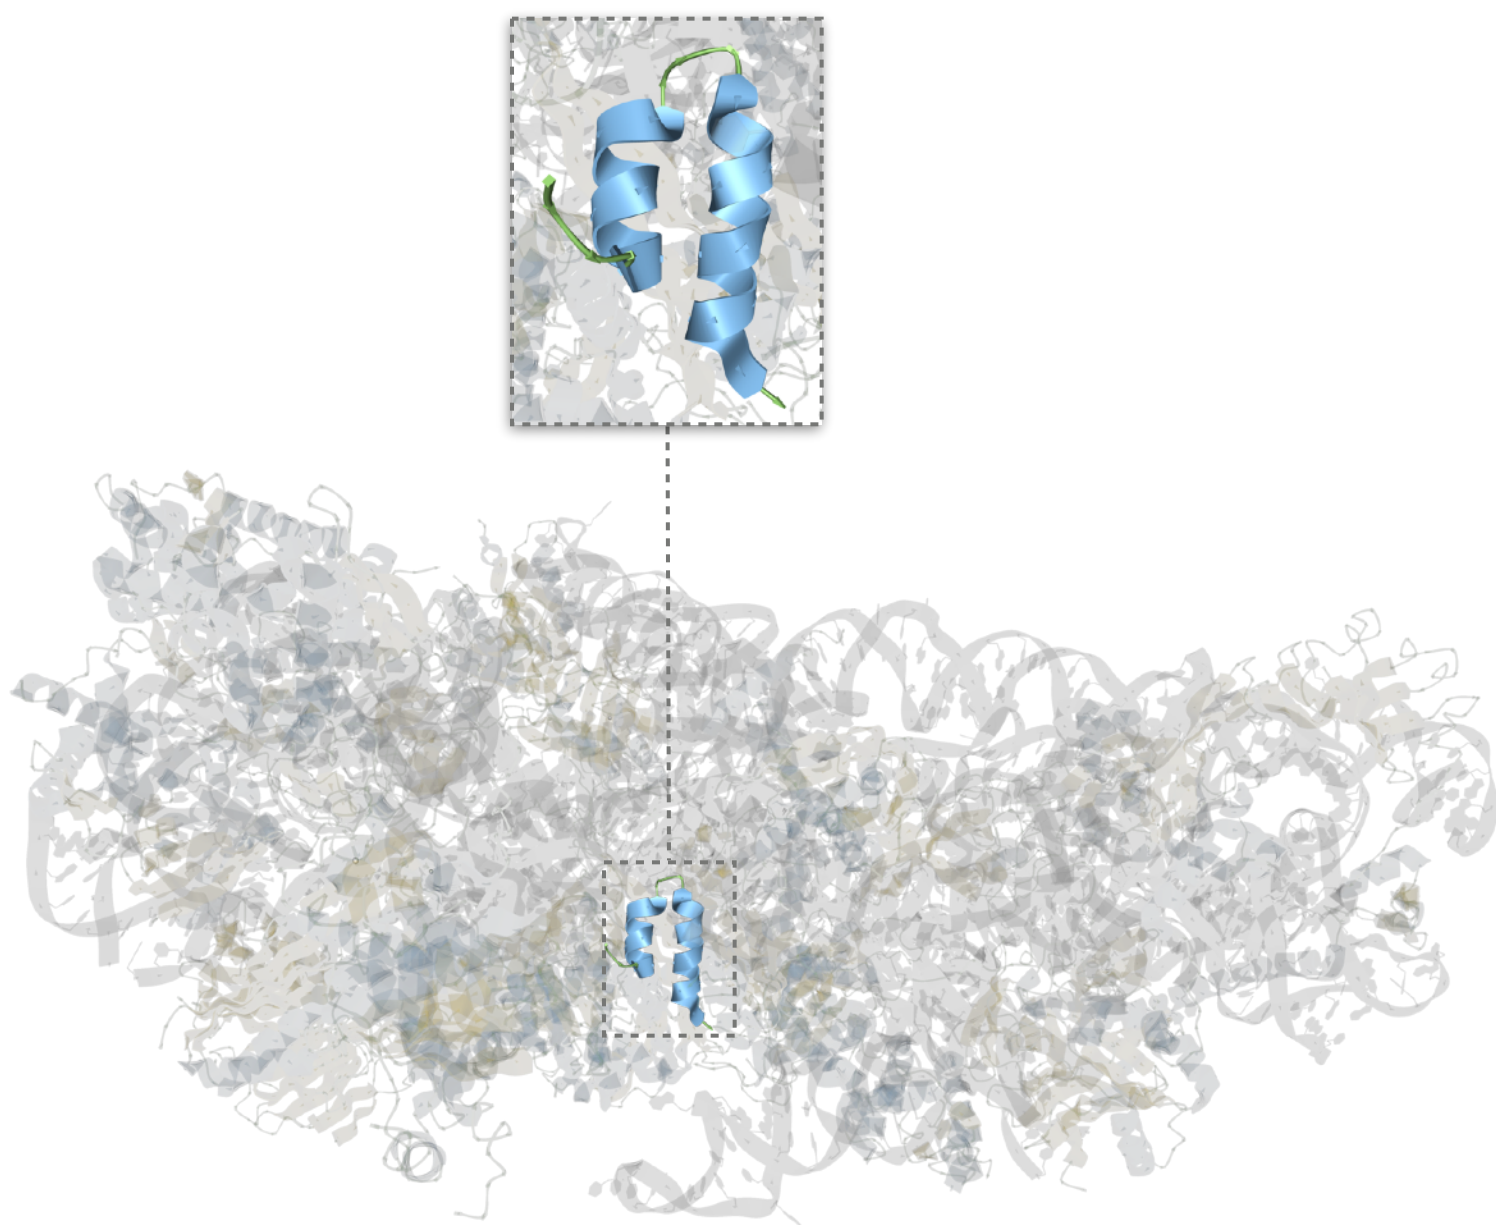**B** NSP3 (SUD-N) + PAIP1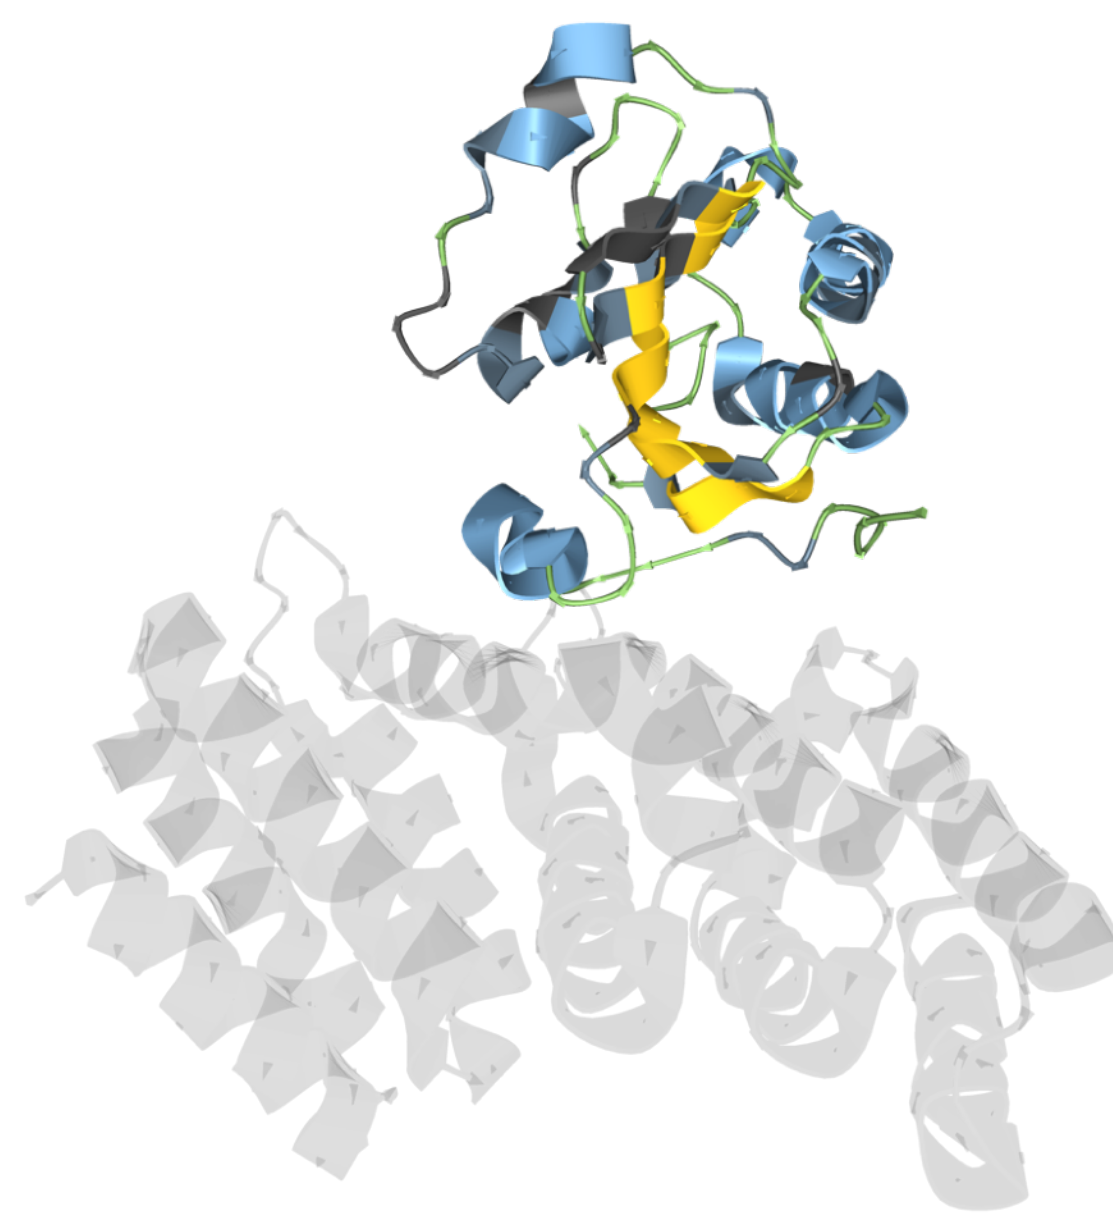**C** NSP3 (PL-Pro) + ubiquitin-like domains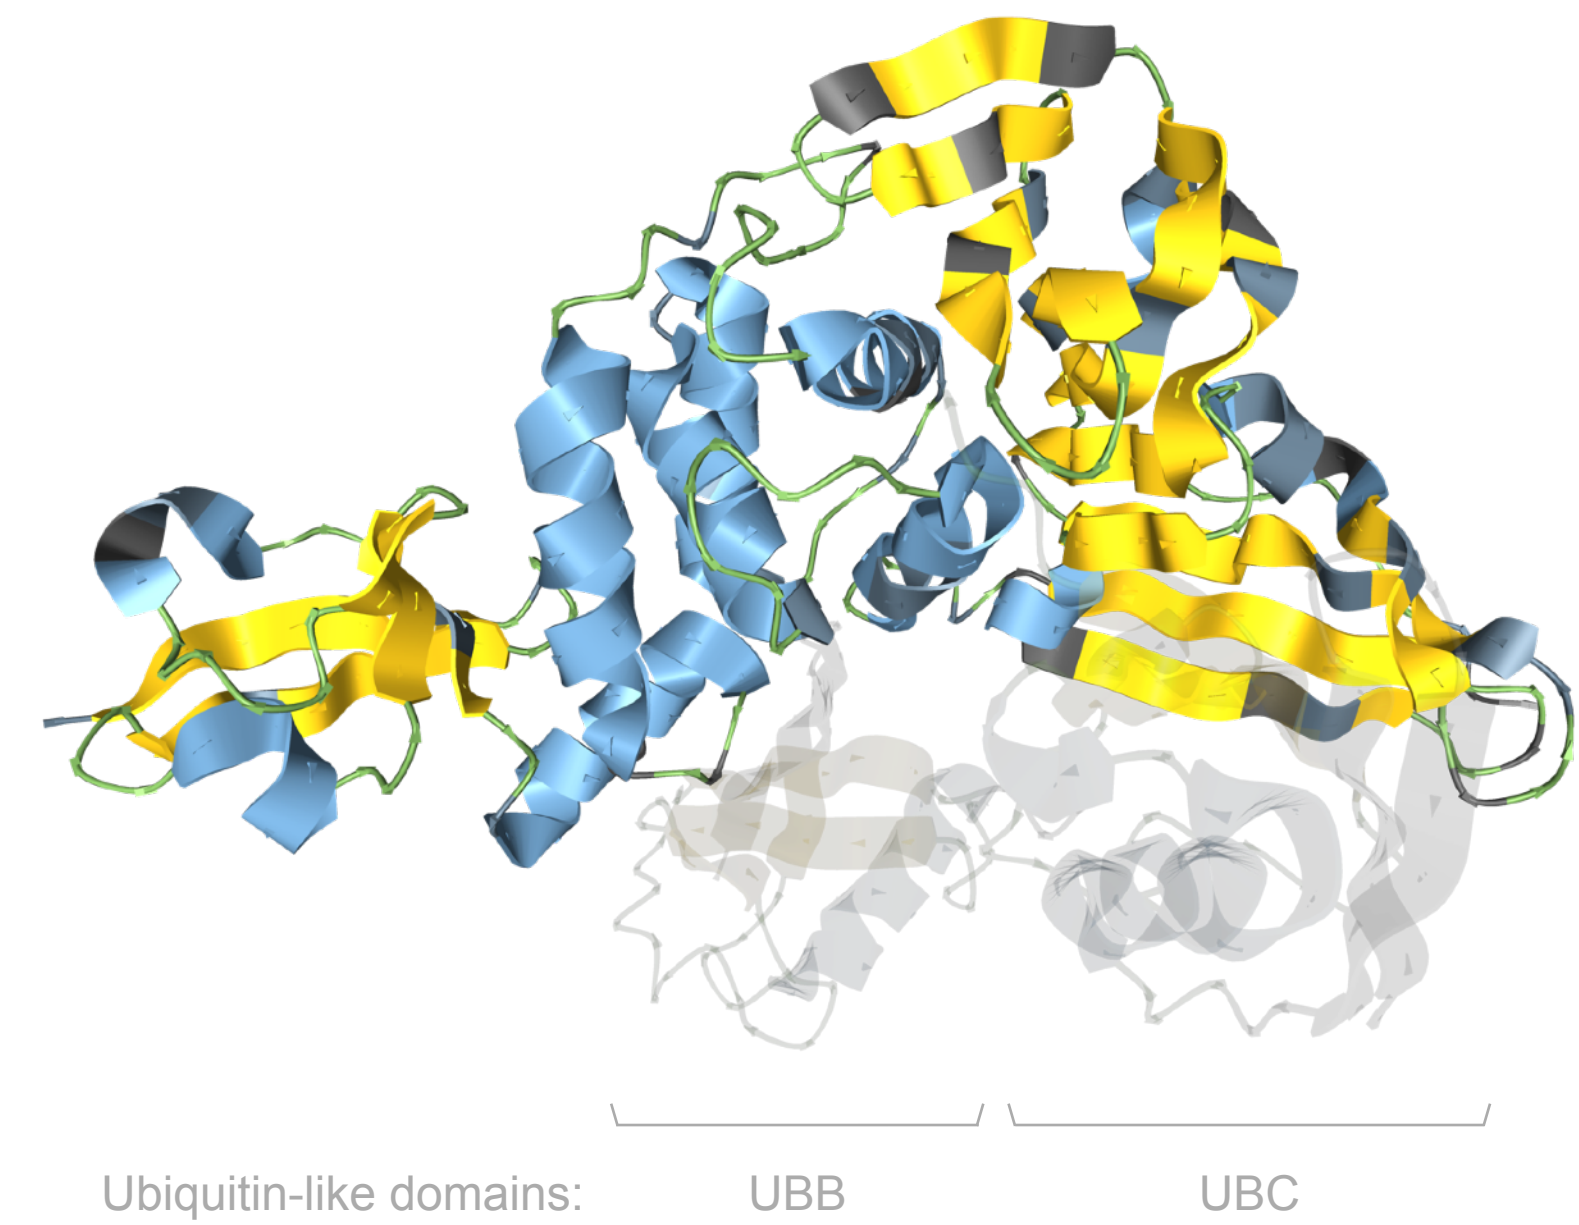**D** Spike glycoprotein + ACE2 + SLC6A19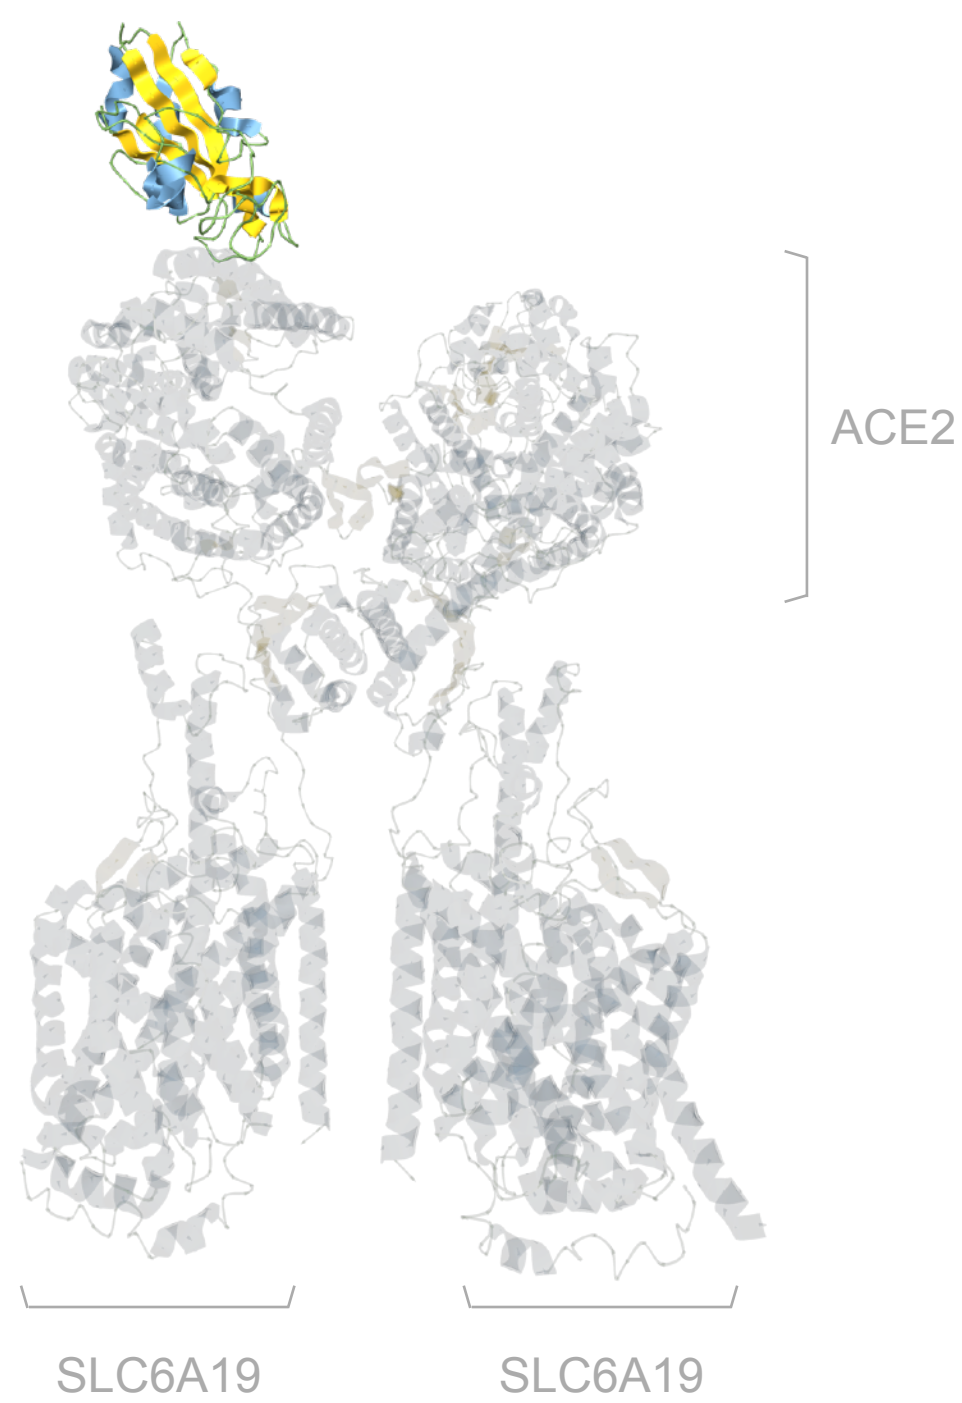**E** Spike glycoprotein + NRP1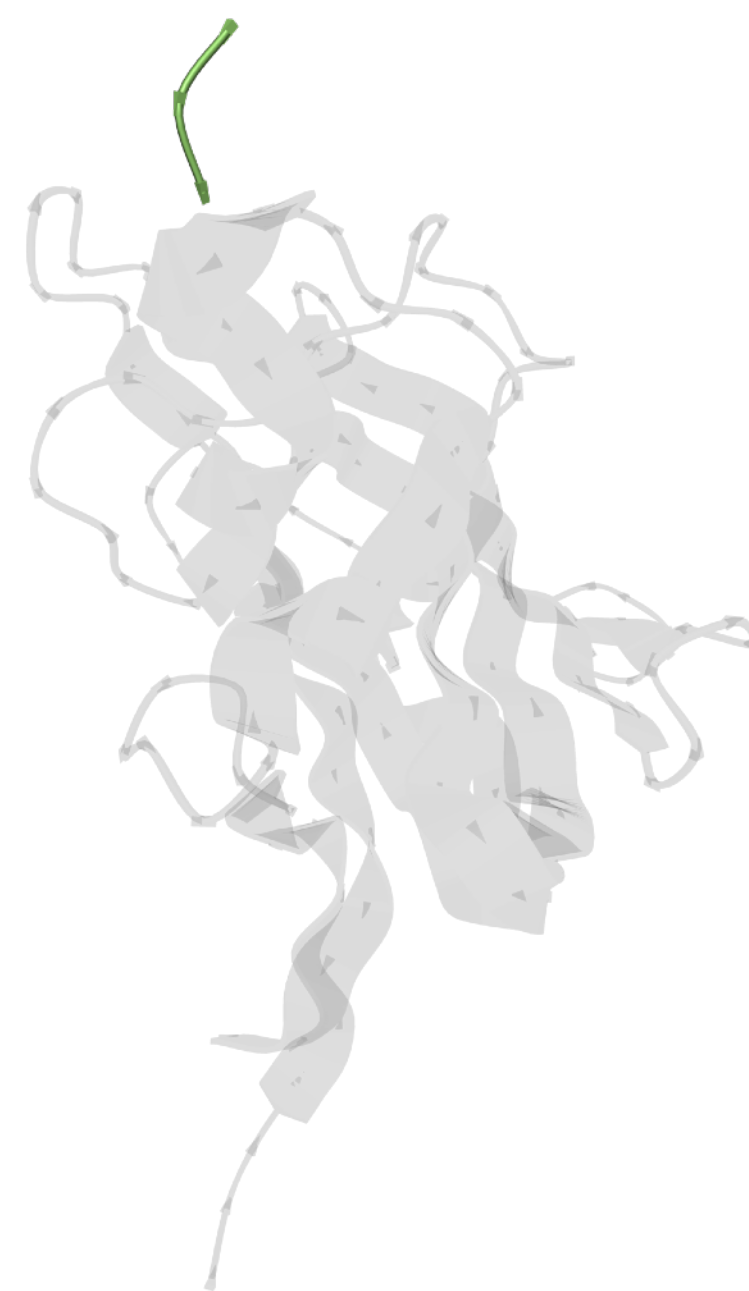**F** Envelope protein + MPP5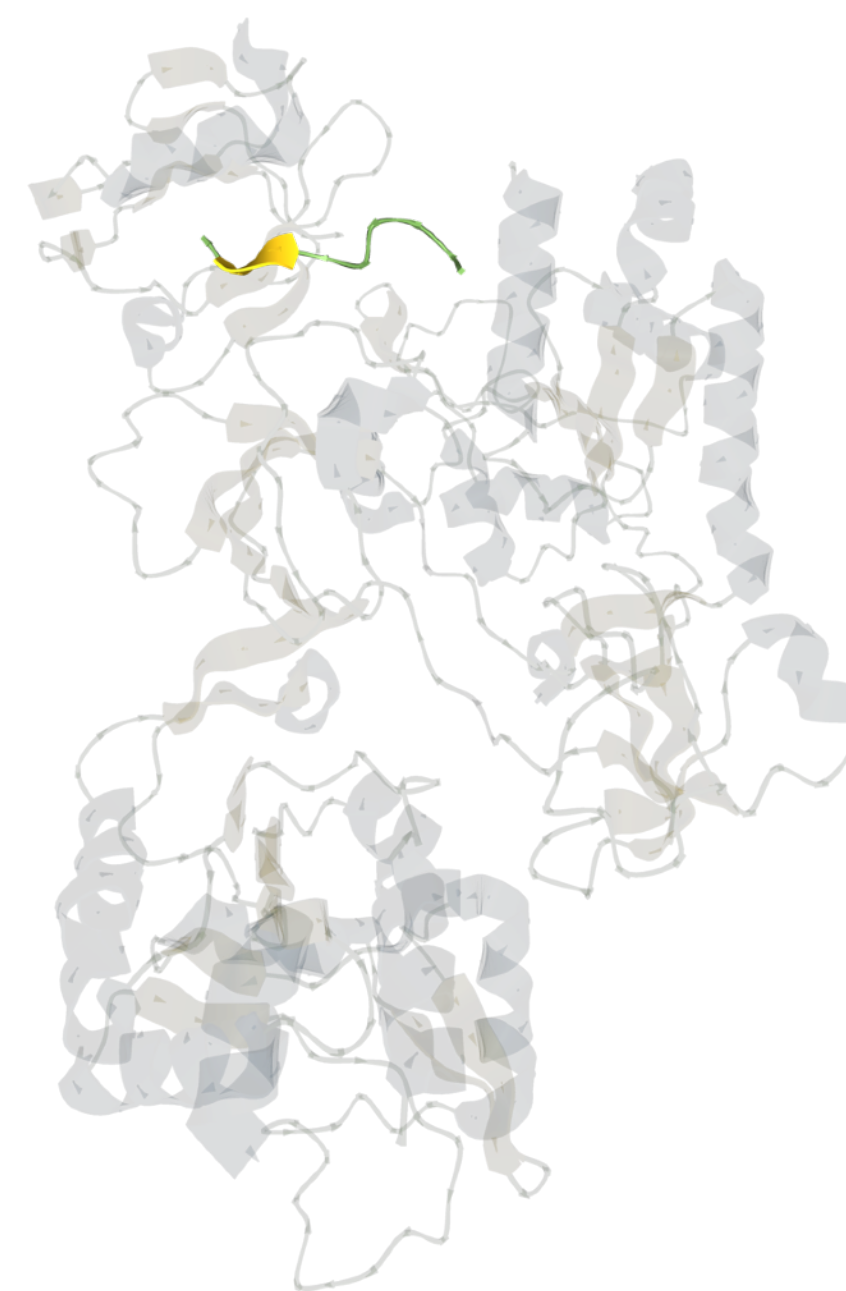**G** ORF9b protein + TOMM70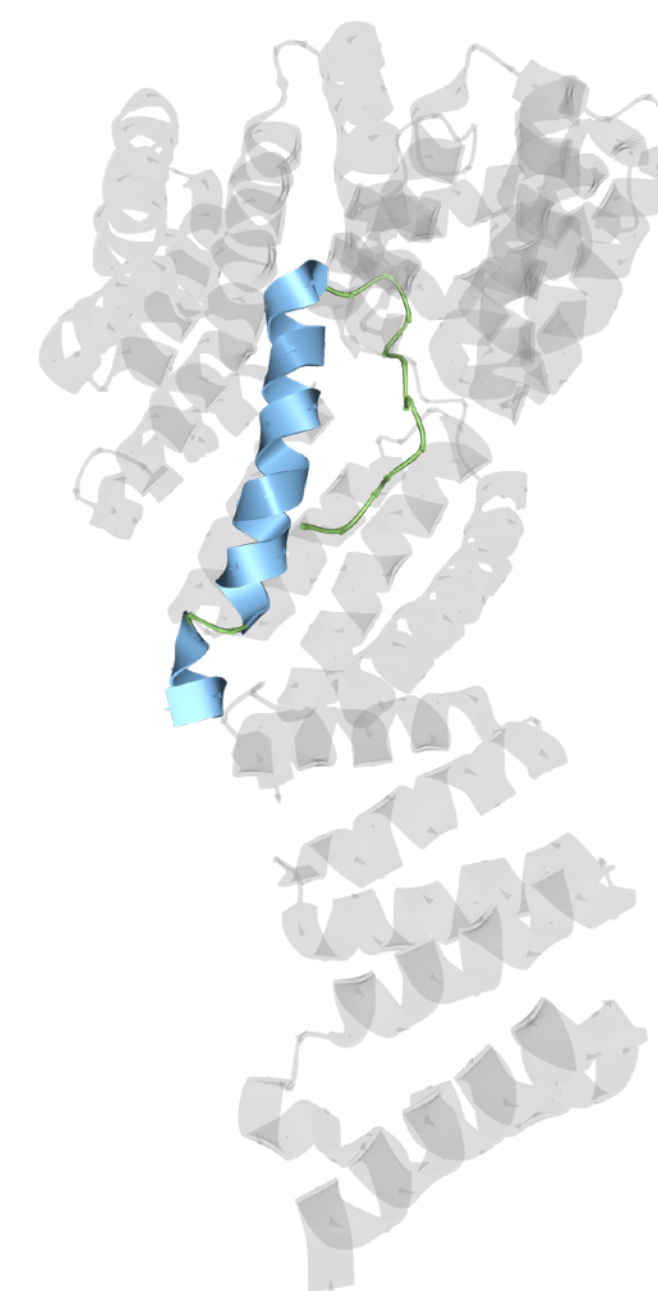**Legend**

**Viral proteins:** Conserved helix (●), Conserved sheet (●), Conserved coil (●), Amino acid substitutions (●)

**Human proteins/RNA:** ●

**A**

## Viral interaction team 1 (NSP7, NSP8, NSP9, NSP12, NSP13)

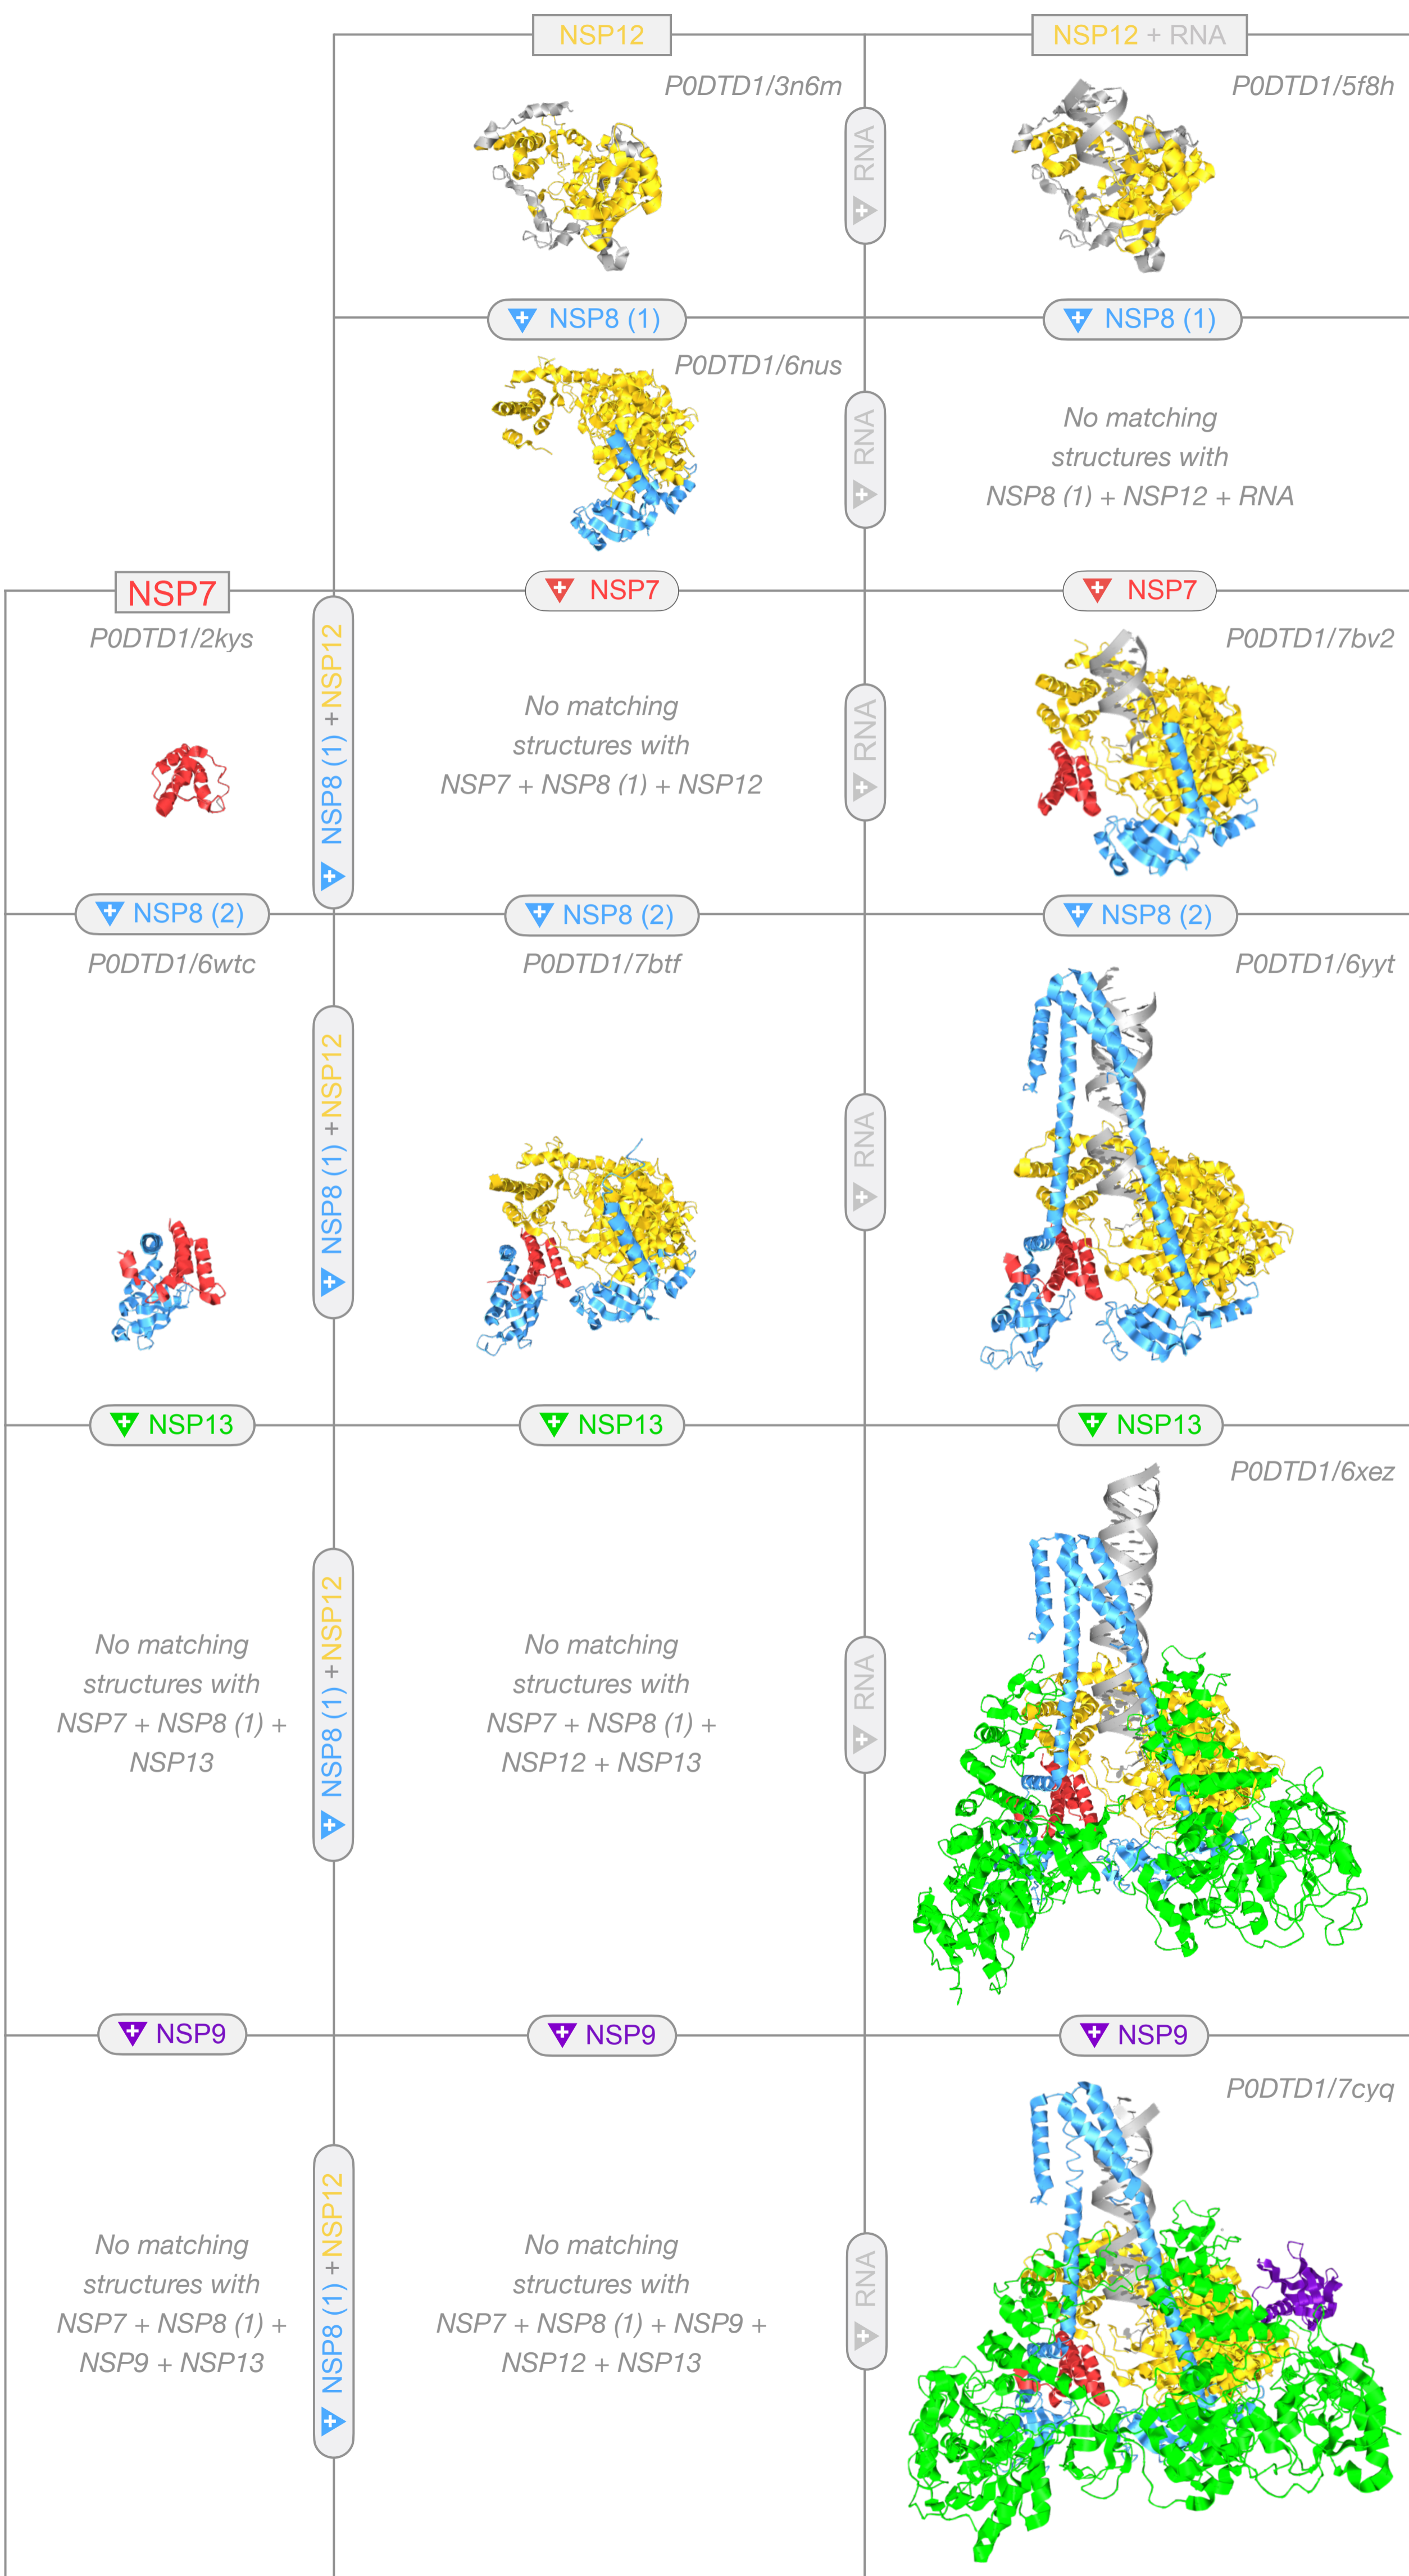**B**

## Viral interaction team 2 (NSP10, NSP14, NSP16)

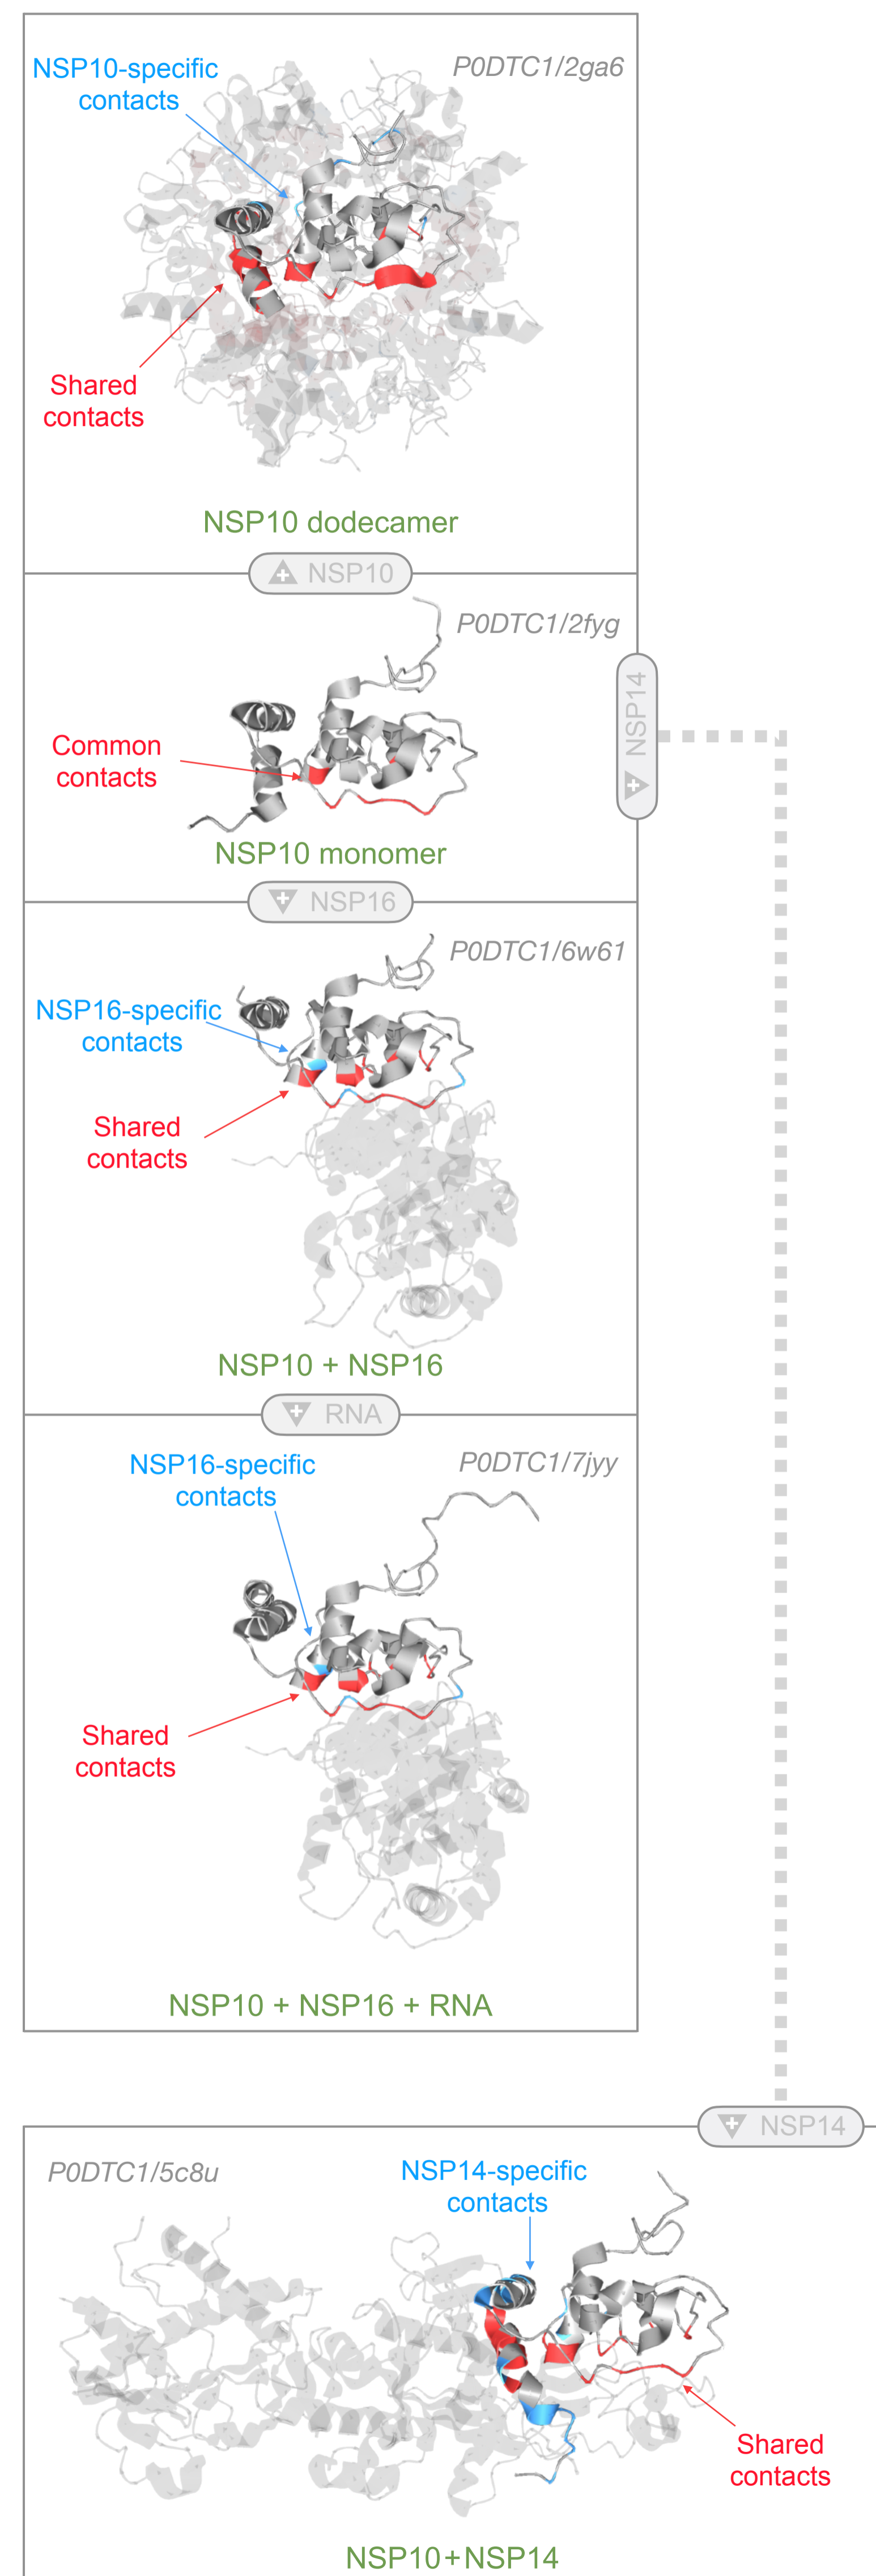

Supplement: MSB-17-e10079-s006.pdf [file MSB-17-e10079-s006.pdf]
